# Supplementary material
Source: publisher site journal article supplement (https://www.dovepress.com/article/550568)
Supplement: Supplementary file 1 [file Supplementary_Material.docx]

Table S1 The compounds information of AAE

| **Name** | **Formula** | **CAS number** |
| --- | --- | --- |
| Arteannuin B | C15H20O3 | 50906-56-4 |
| Chlorogenic acid | C16H18O9 | 327-97-9 |
| Chrysosplenol D | C18H16O8 | 14965-20-9 |
| Scopolin | C16H18O9 | 531-44-2 |
| Vitexicarpin | C19H18O8 | 479-91-4 |

**Abbreviation:** AAE, *Artemisia annua* extract.

Table S2 Primer sequences used in this study

| **Name** | **forward primer sequence（5′-3′）** | **reverse primer sequence（3′-5′）** |
| --- | --- | --- |
| FLG | TGAAGCCTATGACACCACTGA | TCCCCTACGCTTTCTTGTCCT |
| LOR | GCACCACACAGACGAGTATGA | GGTGATGCGATCAGAGGATTC |
| DSG1 | GCAGAAACGTGAATGGATCAAGT | AATTTTGGCGATTGGGTTCCT |
| Has3 | CAGCCTATGTGACGGGCTAC | CCTCCTGGTATGCGGCAAT |
| NELL2 | GGGGCTGCATAATGGGACG | CAGTCTGACTTCATTCCGATGG |
| GAPDH | GGAGCGAGATCCCTCCAAAAT | GGCTGTTGTCATACTTCTCATGG |

**Abbreviations:** FLG, filaggrin; LOR, loricrin; DSG1, desmoglein-1; HAS3, hyaluronan synthase 3; NELL2, neural epidermal growth factor-like 2; GAPDH: glyceraldehyde-3-phosphate dehydrogenase.
